# Supplementary material
Source: publisher site journal article supplement (https://www.spandidos-publications.com/2634/downloadSupplementary)
Supplement: Supplementary file 1 [file downloadSupplementary]

## Sheet: Table S10 Up_KEGG_pathway_iden
Table SX. Up_KEGG_pathway_iden.
#Term	Database	ID	Input number	Background number	P-value	Corrected P-value	Input	Hyperlink
Antigen processing and presentation	KEGG PATHWAY	hsa04612	5	78	0.000171181	0.020884	HLA-DMB|HSPA1A|HLA-G|HSPA6|HSPA1B	http://www.genome.jp/kegg-bin/show_pathway?hsa04612/hsa:3304%09red/hsa:3310%09red/hsa:3109%09red/hsa:3135%09red/hsa:3303%09red
Legionellosis	KEGG PATHWAY	hsa05134	4	55	0.000498279	0.0211982	HSPA1B|HSPA1A|HSPA6|IL12A	http://www.genome.jp/kegg-bin/show_pathway?hsa05134/hsa:3304%09red/hsa:3310%09red/hsa:3592%09red/hsa:3303%09red
Estrogen signaling pathway	KEGG PATHWAY	hsa04915	5	99	0.000521267	0.0211982	HSPA1B|HSPA1A|HSPA6|CREB5|GRM1	http://www.genome.jp/kegg-bin/show_pathway?hsa04915/hsa:3304%09red/hsa:3310%09red/hsa:2911%09red/hsa:9586%09red/hsa:3303%09red
Influenza A	KEGG PATHWAY	hsa05164	6	176	0.00113653	0.0293434	HSPA6|DNAJB1|IL12A|HSPA1B|HSPA1A|HLA-DMB	http://www.genome.jp/kegg-bin/show_pathway?hsa05164/hsa:3337%09red/hsa:3592%09red/hsa:3304%09red/hsa:3310%09red/hsa:3109%09red/hsa:3303%09red
Toxoplasmosis	KEGG PATHWAY	hsa05145	5	119	0.0012026	0.0293434	HSPA1B|HSPA1A|HLA-DMB|HSPA6|IL12A	http://www.genome.jp/kegg-bin/show_pathway?hsa05145/hsa:3304%09red/hsa:3592%09red/hsa:3109%09red/hsa:3310%09red/hsa:3303%09red
Allograft rejection	KEGG PATHWAY	hsa05330	3	39	0.00227309	0.0407122	HLA-DMB|HLA-G|IL12A	http://www.genome.jp/kegg-bin/show_pathway?hsa05330/hsa:3592%09red/hsa:3135%09red/hsa:3109%09red
Taste transduction	KEGG PATHWAY	hsa04742	4	83	0.00233595	0.0407122	GRM1|TAS2R19|TAS2R30|TAS2R31	http://www.genome.jp/kegg-bin/show_pathway?hsa04742/hsa:259294%09red/hsa:2911%09red/hsa:259290%09red/hsa:259293%09red
Type I diabetes mellitus	KEGG PATHWAY	hsa04940	3	44	0.00321668	0.0490544	HLA-DMB|HLA-G|IL12A	http://www.genome.jp/kegg-bin/show_pathway?hsa04940/hsa:3592%09red/hsa:3135%09red/hsa:3109%09red
MAPK signaling pathway	KEGG PATHWAY	hsa04010	6	255	0.00720757	0.096414	HSPA6|CACNA1G|HSPA1B|HSPA1A|PPP5D1|FGF5	http://www.genome.jp/kegg-bin/show_pathway?hsa04010/hsa:3304%09red/hsa:100506012%09red/hsa:2250%09red/hsa:3310%09red/hsa:3303%09red/hsa:8913%09red
Endocytosis	KEGG PATHWAY	hsa04144	6	260	0.00790279	0.096414	HSPA6|ADRB1|HLA-G|ACAP1|HSPA1B|HSPA1A	http://www.genome.jp/kegg-bin/show_pathway?hsa04144/hsa:3304%09red/hsa:153%09red/hsa:3310%09red/hsa:9744%09red/hsa:3303%09red/hsa:3135%09red
Longevity regulating pathway - multiple species	KEGG PATHWAY	hsa04213	3	64	0.00920357	0.101801	HSPA1B|HSPA1A|HSPA6	http://www.genome.jp/kegg-bin/show_pathway?hsa04213/hsa:3304%09red/hsa:3310%09red/hsa:3303%09red
Inflammatory bowel disease (IBD)	KEGG PATHWAY	hsa05321	3	66	0.0100132	0.101801	STAT4|HLA-DMB|IL12A	http://www.genome.jp/kegg-bin/show_pathway?hsa05321/hsa:3592%09red/hsa:6775%09red/hsa:3109%09red
Measles	KEGG PATHWAY	hsa05162	4	136	0.0133347	0.125141	HSPA1B|HSPA1A|HSPA6|IL12A	http://www.genome.jp/kegg-bin/show_pathway?hsa05162/hsa:3304%09red/hsa:3310%09red/hsa:3592%09red/hsa:3303%09red
Gap junction	KEGG PATHWAY	hsa04540	3	88	0.0216459	0.188628	ADRB1|GRM1|TUBB2B	http://www.genome.jp/kegg-bin/show_pathway?hsa04540/hsa:2911%09red/hsa:153%09red/hsa:347733%09red
Protein processing in endoplasmic reticulum	KEGG PATHWAY	hsa04141	4	166	0.0257455	0.209397	HSPA1B|DNAJB1|HSPA1A|HSPA6	http://www.genome.jp/kegg-bin/show_pathway?hsa04141/hsa:3304%09red/hsa:3337%09red/hsa:3310%09red/hsa:3303%09red
Tryptophan metabolism	KEGG PATHWAY	hsa00380	2	40	0.0299889	0.228665	OGDHL|INMT	http://www.genome.jp/kegg-bin/show_pathway?hsa00380/hsa:11185%09red/hsa:55753%09red
Graft-versus-host disease	KEGG PATHWAY	hsa05332	2	42	0.0328209	0.235539	HLA-DMB|HLA-G	http://www.genome.jp/kegg-bin/show_pathway?hsa05332/hsa:3135%09red/hsa:3109%09red
Sphingolipid metabolism	KEGG PATHWAY	hsa00600	2	47	0.0403362	0.272633	UGT8|ASAH2	http://www.genome.jp/kegg-bin/show_pathway?hsa00600/hsa:7368%09red/hsa:56624%09red
Arginine and proline metabolism	KEGG PATHWAY	hsa00330	2	50	0.0451283	0.272633	HOGA1|CKMT1B	http://www.genome.jp/kegg-bin/show_pathway?hsa00330/hsa:112817%09red/hsa:1159%09red
cAMP signaling pathway	KEGG PATHWAY	hsa04024	4	199	0.0455169	0.272633	ADRB1|CREB5|GLI1|SUCNR1	http://www.genome.jp/kegg-bin/show_pathway?hsa04024/hsa:56670%09red/hsa:2735%09red/hsa:153%09red/hsa:9586%09red
Epstein-Barr virus infection	KEGG PATHWAY	hsa05169	4	201	0.0469286	0.272633	HSPA1B|HSPA1A|HLA-G|HSPA6	http://www.genome.jp/kegg-bin/show_pathway?hsa05169/hsa:3304%09red/hsa:3310%09red/hsa:3135%09red/hsa:3303%09red
Autoimmune thyroid disease	KEGG PATHWAY	hsa05320	2	54	0.0518271	0.287405	HLA-DMB|HLA-G	http://www.genome.jp/kegg-bin/show_pathway?hsa05320/hsa:3135%09red/hsa:3109%09red
Spliceosome	KEGG PATHWAY	hsa03040	3	134	0.062376	0.30496	HSPA1B|HSPA1A|HSPA6	http://www.genome.jp/kegg-bin/show_pathway?hsa03040/hsa:3304%09red/hsa:3310%09red/hsa:3303%09red
FoxO signaling pathway	KEGG PATHWAY	hsa04068	3	134	0.062376	0.30496	HOMER2|SGK2|GRM1	http://www.genome.jp/kegg-bin/show_pathway?hsa04068/hsa:10110%09red/hsa:2911%09red/hsa:9455%09red
Viral myocarditis	KEGG PATHWAY	hsa05416	2	60	0.0624918	0.30496	HLA-DMB|HLA-G	http://www.genome.jp/kegg-bin/show_pathway?hsa05416/hsa:3135%09red/hsa:3109%09red
Cell adhesion molecules (CAMs)	KEGG PATHWAY	hsa04514	3	145	0.0752312	0.353008	HLA-DMB|HLA-G|SIGLEC1	http://www.genome.jp/kegg-bin/show_pathway?hsa04514/hsa:6614%09red/hsa:3135%09red/hsa:3109%09red
Phagosome	KEGG PATHWAY	hsa04145	3	155	0.0878607	0.391635	HLA-DMB|HLA-G|TUBB2B	http://www.genome.jp/kegg-bin/show_pathway?hsa04145/hsa:347733%09red/hsa:3135%09red/hsa:3109%09red
Leishmaniasis	KEGG PATHWAY	hsa05140	2	74	0.0898835	0.391635	HLA-DMB|IL12A	http://www.genome.jp/kegg-bin/show_pathway?hsa05140/hsa:3592%09red/hsa:3109%09red
Aldosterone synthesis and secretion	KEGG PATHWAY	hsa04925	2	81	0.104694	0.431583	CREB5|CACNA1G	http://www.genome.jp/kegg-bin/show_pathway?hsa04925/hsa:8913%09red/hsa:9586%09red
Selenocompound metabolism	KEGG PATHWAY	hsa00450	1	17	0.109665	0.431583	INMT	http://www.genome.jp/kegg-bin/show_pathway?hsa00450/hsa:11185%09red
Primary bile acid biosynthesis	KEGG PATHWAY	hsa00120	1	17	0.109665	0.431583	CYP27A1	http://www.genome.jp/kegg-bin/show_pathway?hsa00120/hsa:1593%09red
Calcium signaling pathway	KEGG PATHWAY	hsa04020	3	180	0.122987	0.468889	ADRB1|GRM1|CACNA1G	http://www.genome.jp/kegg-bin/show_pathway?hsa04020/hsa:8913%09red/hsa:153%09red/hsa:2911%09red
Herpes simplex infection	KEGG PATHWAY	hsa05168	3	186	0.132096	0.488355	HLA-DMB|HLA-G|IL12A	http://www.genome.jp/kegg-bin/show_pathway?hsa05168/hsa:3592%09red/hsa:3135%09red/hsa:3109%09red
Mismatch repair	KEGG PATHWAY	hsa03430	1	23	0.145485	0.522033	RPA4	http://www.genome.jp/kegg-bin/show_pathway?hsa03430/hsa:29935%09red
Viral carcinogenesis	KEGG PATHWAY	hsa05203	3	205	0.162423	0.555389	HIST1H2BM|CREB5|HLA-G	http://www.genome.jp/kegg-bin/show_pathway?hsa05203/hsa:3135%09red/hsa:9586%09red/hsa:8342%09red
Phototransduction	KEGG PATHWAY	hsa04744	1	27	0.168577	0.555389	GNAT2	http://www.genome.jp/kegg-bin/show_pathway?hsa04744/hsa:2780%09red
Glyoxylate and dicarboxylate metabolism	KEGG PATHWAY	hsa00630	1	28	0.174254	0.555389	HOGA1	http://www.genome.jp/kegg-bin/show_pathway?hsa00630/hsa:112817%09red
Homologous recombination	KEGG PATHWAY	hsa03440	1	29	0.179893	0.555389	RPA4	http://www.genome.jp/kegg-bin/show_pathway?hsa03440/hsa:29935%09red
Glutamatergic synapse	KEGG PATHWAY	hsa04724	2	114	0.181431	0.555389	HOMER2|GRM1	http://www.genome.jp/kegg-bin/show_pathway?hsa04724/hsa:2911%09red/hsa:9455%09red
Citrate cycle (TCA cycle)	KEGG PATHWAY	hsa00020	1	30	0.185494	0.555389	OGDHL	http://www.genome.jp/kegg-bin/show_pathway?hsa00020/hsa:55753%09red
Mucin type O-Glycan biosynthesis	KEGG PATHWAY	hsa00512	1	31	0.191057	0.555389	ST6GALNAC1	http://www.genome.jp/kegg-bin/show_pathway?hsa00512/hsa:55808%09red
Asthma	KEGG PATHWAY	hsa05310	1	32	0.196584	0.555389	HLA-DMB	http://www.genome.jp/kegg-bin/show_pathway?hsa05310/hsa:3109%09red
Prion diseases	KEGG PATHWAY	hsa05020	1	35	0.212943	0.555389	HSPA1A	http://www.genome.jp/kegg-bin/show_pathway?hsa05020/hsa:3303%09red
African trypanosomiasis	KEGG PATHWAY	hsa05143	1	35	0.212943	0.555389	IL12A	http://www.genome.jp/kegg-bin/show_pathway?hsa05143/hsa:3592%09red
DNA replication	KEGG PATHWAY	hsa03030	1	36	0.218323	0.555389	RPA4	http://www.genome.jp/kegg-bin/show_pathway?hsa03030/hsa:29935%09red
Systemic lupus erythematosus	KEGG PATHWAY	hsa05322	2	136	0.236289	0.555389	HIST1H2BM|HLA-DMB	http://www.genome.jp/kegg-bin/show_pathway?hsa05322/hsa:3109%09red/hsa:8342%09red
Glycine, serine and threonine metabolism	KEGG PATHWAY	hsa00260	1	40	0.239485	0.555389	GNMT	http://www.genome.jp/kegg-bin/show_pathway?hsa00260/hsa:27232%09red
Tight junction	KEGG PATHWAY	hsa04530	2	139	0.243873	0.555389	SHROOM2|MAGI2	http://www.genome.jp/kegg-bin/show_pathway?hsa04530/hsa:9863%09red/hsa:357%09red
HTLV-I infection	KEGG PATHWAY	hsa05166	3	259	0.257644	0.555389	HLA-DMB|MSX2|HLA-G	http://www.genome.jp/kegg-bin/show_pathway?hsa05166/hsa:4488%09red/hsa:3135%09red/hsa:3109%09red
Vasopressin-regulated water reabsorption	KEGG PATHWAY	hsa04962	1	44	0.260086	0.555389	CREB5	http://www.genome.jp/kegg-bin/show_pathway?hsa04962/hsa:9586%09red
Hepatitis B	KEGG PATHWAY	hsa05161	2	146	0.26161	0.555389	CREB5|STAT4	http://www.genome.jp/kegg-bin/show_pathway?hsa05161/hsa:6775%09red/hsa:9586%09red
Ether lipid metabolism	KEGG PATHWAY	hsa00565	1	45	0.26515	0.555389	UGT8	http://www.genome.jp/kegg-bin/show_pathway?hsa00565/hsa:7368%09red
Basal transcription factors	KEGG PATHWAY	hsa03022	1	45	0.26515	0.555389	TAF7L	http://www.genome.jp/kegg-bin/show_pathway?hsa03022/hsa:54457%09red
Adrenergic signaling in cardiomyocytes	KEGG PATHWAY	hsa04261	2	149	0.269222	0.555389	ADRB1|CREB5	http://www.genome.jp/kegg-bin/show_pathway?hsa04261/hsa:153%09red/hsa:9586%09red
Hedgehog signaling pathway	KEGG PATHWAY	hsa04340	1	47	0.275177	0.555389	GLI1	http://www.genome.jp/kegg-bin/show_pathway?hsa04340/hsa:2735%09red
Nucleotide excision repair	KEGG PATHWAY	hsa03420	1	47	0.275177	0.555389	RPA4	http://www.genome.jp/kegg-bin/show_pathway?hsa03420/hsa:29935%09red
Type II diabetes mellitus	KEGG PATHWAY	hsa04930	1	48	0.280141	0.555389	CACNA1G	http://www.genome.jp/kegg-bin/show_pathway?hsa04930/hsa:8913%09red
Malaria	KEGG PATHWAY	hsa05144	1	49	0.28507	0.555389	IL12A	http://www.genome.jp/kegg-bin/show_pathway?hsa05144/hsa:3592%09red
Intestinal immune network for IgA production	KEGG PATHWAY	hsa04672	1	49	0.28507	0.555389	HLA-DMB	http://www.genome.jp/kegg-bin/show_pathway?hsa04672/hsa:3109%09red
Cocaine addiction	KEGG PATHWAY	hsa05030	1	49	0.28507	0.555389	CREB5	http://www.genome.jp/kegg-bin/show_pathway?hsa05030/hsa:9586%09red
Jak-STAT signaling pathway	KEGG PATHWAY	hsa04630	2	158	0.292051	0.555389	STAT4|IL12A	http://www.genome.jp/kegg-bin/show_pathway?hsa04630/hsa:6775%09red/hsa:3592%09red
Neuroactive ligand-receptor interaction	KEGG PATHWAY	hsa04080	3	278	0.293044	0.555389	ADRB1|GRM1|NPFFR1	http://www.genome.jp/kegg-bin/show_pathway?hsa04080/hsa:64106%09red/hsa:2911%09red/hsa:153%09red
Glutathione metabolism	KEGG PATHWAY	hsa00480	1	52	0.299662	0.555389	GSTT2	http://www.genome.jp/kegg-bin/show_pathway?hsa00480/hsa:2953%09red
Lysine degradation	KEGG PATHWAY	hsa00310	1	52	0.299662	0.555389	OGDHL	http://www.genome.jp/kegg-bin/show_pathway?hsa00310/hsa:55753%09red
Pathogenic Escherichia coli infection	KEGG PATHWAY	hsa05130	1	55	0.313963	0.555389	TUBB2B	http://www.genome.jp/kegg-bin/show_pathway?hsa05130/hsa:347733%09red
Fanconi anemia pathway	KEGG PATHWAY	hsa03460	1	55	0.313963	0.555389	RPA4	http://www.genome.jp/kegg-bin/show_pathway?hsa03460/hsa:29935%09red
Basal cell carcinoma	KEGG PATHWAY	hsa05217	1	55	0.313963	0.555389	GLI1	http://www.genome.jp/kegg-bin/show_pathway?hsa05217/hsa:2735%09red
cGMP-PKG signaling pathway	KEGG PATHWAY	hsa04022	2	167	0.314812	0.555389	ADRB1|CREB5	http://www.genome.jp/kegg-bin/show_pathway?hsa04022/hsa:153%09red/hsa:9586%09red
Regulation of lipolysis in adipocytes	KEGG PATHWAY	hsa04923	1	56	0.318666	0.555389	ADRB1	http://www.genome.jp/kegg-bin/show_pathway?hsa04923/hsa:153%09red
Non-small cell lung cancer	KEGG PATHWAY	hsa05223	1	56	0.318666	0.555389	FHIT	http://www.genome.jp/kegg-bin/show_pathway?hsa05223/hsa:2272%09red
Staphylococcus aureus infection	KEGG PATHWAY	hsa05150	1	57	0.323337	0.555593	HLA-DMB	http://www.genome.jp/kegg-bin/show_pathway?hsa05150/hsa:3109%09red
Long-term depression	KEGG PATHWAY	hsa04730	1	60	0.337164	0.568667	GRM1	http://www.genome.jp/kegg-bin/show_pathway?hsa04730/hsa:2911%09red
Alcoholism	KEGG PATHWAY	hsa05034	2	179	0.344929	0.568667	HIST1H2BM|CREB5	http://www.genome.jp/kegg-bin/show_pathway?hsa05034/hsa:9586%09red/hsa:8342%09red
Tuberculosis	KEGG PATHWAY	hsa05152	2	179	0.344929	0.568667	HLA-DMB|IL12A	http://www.genome.jp/kegg-bin/show_pathway?hsa05152/hsa:3592%09red/hsa:3109%09red
Renin secretion	KEGG PATHWAY	hsa04924	1	64	0.35517	0.577351	ADRB1	http://www.genome.jp/kegg-bin/show_pathway?hsa04924/hsa:153%09red
Long-term potentiation	KEGG PATHWAY	hsa04720	1	66	0.363992	0.577351	GRM1	http://www.genome.jp/kegg-bin/show_pathway?hsa04720/hsa:2911%09red
Amphetamine addiction	KEGG PATHWAY	hsa05031	1	67	0.368359	0.577351	CREB5	http://www.genome.jp/kegg-bin/show_pathway?hsa05031/hsa:9586%09red
Drug metabolism - cytochrome P450	KEGG PATHWAY	hsa00982	1	69	0.377005	0.577351	GSTT2	http://www.genome.jp/kegg-bin/show_pathway?hsa00982/hsa:2953%09red
RIG-I-like receptor signaling pathway	KEGG PATHWAY	hsa04622	1	70	0.381284	0.577351	IL12A	http://www.genome.jp/kegg-bin/show_pathway?hsa04622/hsa:3592%09red
Thyroid hormone synthesis	KEGG PATHWAY	hsa04918	1	71	0.385534	0.577351	CREB5	http://www.genome.jp/kegg-bin/show_pathway?hsa04918/hsa:9586%09red
Melanoma	KEGG PATHWAY	hsa05218	1	71	0.385534	0.577351	FGF5	http://www.genome.jp/kegg-bin/show_pathway?hsa05218/hsa:2250%09red
PPAR signaling pathway	KEGG PATHWAY	hsa03320	1	72	0.389756	0.577351	CYP27A1	http://www.genome.jp/kegg-bin/show_pathway?hsa03320/hsa:1593%09red
Metabolism of xenobiotics by cytochrome P450	KEGG PATHWAY	hsa00980	1	73	0.39395	0.577351	GSTT2	http://www.genome.jp/kegg-bin/show_pathway?hsa00980/hsa:2953%09red
Pertussis	KEGG PATHWAY	hsa05133	1	75	0.402252	0.577351	IL12A	http://www.genome.jp/kegg-bin/show_pathway?hsa05133/hsa:3592%09red
Platinum drug resistance	KEGG PATHWAY	hsa01524	1	75	0.402252	0.577351	GSTT2	http://www.genome.jp/kegg-bin/show_pathway?hsa01524/hsa:2953%09red
PI3K-Akt signaling pathway	KEGG PATHWAY	hsa04151	3	341	0.411419	0.583641	CREB5|FGF5|SGK2	http://www.genome.jp/kegg-bin/show_pathway?hsa04151/hsa:10110%09red/hsa:2250%09red/hsa:9586%09red
Rap1 signaling pathway	KEGG PATHWAY	hsa04015	2	211	0.42298	0.593144	FGF5|MAGI2	http://www.genome.jp/kegg-bin/show_pathway?hsa04015/hsa:9863%09red/hsa:2250%09red
Chemical carcinogenesis	KEGG PATHWAY	hsa05204	1	82	0.430444	0.596751	GSTT2	http://www.genome.jp/kegg-bin/show_pathway?hsa05204/hsa:2953%09red
Insulin secretion	KEGG PATHWAY	hsa04911	1	85	0.442123	0.603229	CREB5	http://www.genome.jp/kegg-bin/show_pathway?hsa04911/hsa:9586%09red
Small cell lung cancer	KEGG PATHWAY	hsa05222	1	86	0.445964	0.603229	FHIT	http://www.genome.jp/kegg-bin/show_pathway?hsa05222/hsa:2272%09red
Salivary secretion	KEGG PATHWAY	hsa04970	1	89	0.457332	0.603229	ADRB1	http://www.genome.jp/kegg-bin/show_pathway?hsa04970/hsa:153%09red
Prostate cancer	KEGG PATHWAY	hsa05215	1	89	0.457332	0.603229	CREB5	http://www.genome.jp/kegg-bin/show_pathway?hsa05215/hsa:9586%09red
Dilated cardiomyopathy	KEGG PATHWAY	hsa05414	1	90	0.46107	0.603229	ADRB1	http://www.genome.jp/kegg-bin/show_pathway?hsa05414/hsa:153%09red
Rheumatoid arthritis	KEGG PATHWAY	hsa05323	1	91	0.464783	0.603229	HLA-DMB	http://www.genome.jp/kegg-bin/show_pathway?hsa05323/hsa:3109%09red
Longevity regulating pathway	KEGG PATHWAY	hsa04211	1	94	0.475772	0.60922	CREB5	http://www.genome.jp/kegg-bin/show_pathway?hsa04211/hsa:9586%09red
Circadian entrainment	KEGG PATHWAY	hsa04713	1	95	0.479386	0.60922	CACNA1G	http://www.genome.jp/kegg-bin/show_pathway?hsa04713/hsa:8913%09red
Amoebiasis	KEGG PATHWAY	hsa05146	1	100	0.497092	0.621102	IL12A	http://www.genome.jp/kegg-bin/show_pathway?hsa05146/hsa:3592%09red
Retrograde endocannabinoid signaling	KEGG PATHWAY	hsa04723	1	101	0.500562	0.621102	GRM1	http://www.genome.jp/kegg-bin/show_pathway?hsa04723/hsa:2911%09red
Glucagon signaling pathway	KEGG PATHWAY	hsa04922	1	102	0.504009	0.621102	CREB5	http://www.genome.jp/kegg-bin/show_pathway?hsa04922/hsa:9586%09red
Chagas disease (American trypanosomiasis)	KEGG PATHWAY	hsa05142	1	104	0.510832	0.623215	IL12A	http://www.genome.jp/kegg-bin/show_pathway?hsa05142/hsa:3592%09red
Toll-like receptor signaling pathway	KEGG PATHWAY	hsa04620	1	106	0.517563	0.625175	IL12A	http://www.genome.jp/kegg-bin/show_pathway?hsa04620/hsa:3592%09red
Insulin resistance	KEGG PATHWAY	hsa04931	1	109	0.52749	0.626419	CREB5	http://www.genome.jp/kegg-bin/show_pathway?hsa04931/hsa:9586%09red
TNF signaling pathway	KEGG PATHWAY	hsa04668	1	110	0.530754	0.626419	CREB5	http://www.genome.jp/kegg-bin/show_pathway?hsa04668/hsa:9586%09red
Cholinergic synapse	KEGG PATHWAY	hsa04725	1	111	0.533996	0.626419	CREB5	http://www.genome.jp/kegg-bin/show_pathway?hsa04725/hsa:9586%09red
Carbon metabolism	KEGG PATHWAY	hsa01200	1	113	0.540415	0.627911	OGDHL	http://www.genome.jp/kegg-bin/show_pathway?hsa01200/hsa:55753%09red
Sphingolipid signaling pathway	KEGG PATHWAY	hsa04071	1	121	0.565236	0.650554	ASAH2	http://www.genome.jp/kegg-bin/show_pathway?hsa04071/hsa:56624%09red
AMPK signaling pathway	KEGG PATHWAY	hsa04152	1	124	0.574201	0.654696	CREB5	http://www.genome.jp/kegg-bin/show_pathway?hsa04152/hsa:9586%09red
Dopaminergic synapse	KEGG PATHWAY	hsa04728	1	130	0.591592	0.668279	CREB5	http://www.genome.jp/kegg-bin/show_pathway?hsa04728/hsa:9586%09red
Natural killer cell mediated cytotoxicity	KEGG PATHWAY	hsa04650	1	135	0.605551	0.677658	HLA-G	http://www.genome.jp/kegg-bin/show_pathway?hsa04650/hsa:3135%09red
Ribosome	KEGG PATHWAY	hsa03010	1	137	0.611003	0.677658	RPS10	http://www.genome.jp/kegg-bin/show_pathway?hsa03010/hsa:6204%09red
Signaling pathways regulating pluripotency of stem cells	KEGG PATHWAY	hsa04550	1	142	0.624312	0.685716	ISL1	http://www.genome.jp/kegg-bin/show_pathway?hsa04550/hsa:3670%09red
Phospholipase D signaling pathway	KEGG PATHWAY	hsa04072	1	144	0.62951	0.685716	GRM1	http://www.genome.jp/kegg-bin/show_pathway?hsa04072/hsa:2911%09red
RNA transport	KEGG PATHWAY	hsa03013	1	172	0.695294	0.746538	SUMO4	http://www.genome.jp/kegg-bin/show_pathway?hsa03013/hsa:387082%09red
Purine metabolism	KEGG PATHWAY	hsa00230	1	175	0.701623	0.746538	FHIT	http://www.genome.jp/kegg-bin/show_pathway?hsa00230/hsa:2272%09red
Axon guidance	KEGG PATHWAY	hsa04360	1	176	0.703704	0.746538	SEMA3D	http://www.genome.jp/kegg-bin/show_pathway?hsa04360/hsa:223117%09red
Transcriptional misregulation in cancer	KEGG PATHWAY	hsa05202	1	180	0.711887	0.748709	TSPAN7	http://www.genome.jp/kegg-bin/show_pathway?hsa05202/hsa:7102%09red
Huntington's disease	KEGG PATHWAY	hsa05016	1	193	0.736984	0.768479	CREB5	http://www.genome.jp/kegg-bin/show_pathway?hsa05016/hsa:9586%09red
Pathways in cancer	KEGG PATHWAY	hsa05200	2	397	0.761301	0.783184	FGF5|GLI1	http://www.genome.jp/kegg-bin/show_pathway?hsa05200/hsa:2735%09red/hsa:2250%09red
Metabolic pathways	KEGG PATHWAY	hsa01100	7	1241	0.763925	0.783184	HOGA1|ASAH2|UGT8|CKMT1B|CYP27A1|OGDHL|ST6GALNAC1	http://www.genome.jp/kegg-bin/show_pathway?hsa01100/hsa:112817%09red/hsa:1159%09red/hsa:7368%09red/hsa:56624%09red/hsa:55808%09red/hsa:55753%09red/hsa:1593%09red
Regulation of actin cytoskeleton	KEGG PATHWAY	hsa04810	1	215	0.774664	0.787575	FGF5	http://www.genome.jp/kegg-bin/show_pathway?hsa04810/hsa:2250%09red
Ras signaling pathway	KEGG PATHWAY	hsa04014	1	228	0.794388	0.800954	FGF5	http://www.genome.jp/kegg-bin/show_pathway?hsa04014/hsa:2250%09red
Cytokine-cytokine receptor interaction	KEGG PATHWAY	hsa04060	1	265	0.841729	0.841729	IL12A	http://www.genome.jp/kegg-bin/show_pathway?hsa04060/hsa:3592%09red
